# Supplementary material
Source: PubMed Central journal article supplement (PMC4516906)
Supplement: NIHMS685876-supplement-supplement_1.pdf [file NIHMS685876-supplement-supplement_1.pdf]

**Supplemental Digital Content Table A:**

**Expanded psychoactive medications data administered by pharmaceutical class and level of admission cognitive function**

| Pharmaceutical class by mechanism | FIM Cognitive score at admission | N*   | % ever rec'd† | % rec'd† first 2 days | % rec'd† last 2 days | % rec'd† first & last 2 days | % rec'd† 5+ days | mean # days (for those rec'd†) | median # days (for those rec'd†) | mean % stay (for those rec'd†) | median % stay (for those rec'd†) | % days PRN | % days Sched# | % days Unknown PRN/Sched# |
|-----------------------------------|----------------------------------|------|---------------|-----------------------|----------------------|------------------------------|------------------|--------------------------------|----------------------------------|--------------------------------|----------------------------------|------------|---------------|---------------------------|
| Anxiolytics                       | Overall                          | 2130 | 33            | 19                    | 19                   | 11                           | 23               | 17                             | 12                               | 56                             | 58                               | 37         | 53            | 10                        |
|                                   | Adm cog <=6                      | 339  | 48            | 24                    | 26                   | 14                           | 31               | 21                             | 18                               | 50                             | 50                               | 40         | 45            | 14                        |
|                                   | Adm cog 7-10                     | 374  | 44            | 23                    | 26                   | 12                           | 32               | 19                             | 14                               | 53                             | 52                               | 37         | 55            | 7                         |
|                                   | Adm cog 11-15                    | 495  | 31            | 18                    | 18                   | 11                           | 22               | 17                             | 13                               | 60                             | 67                               | 36         | 57            | 7                         |
|                                   | Adm cog 16-20                    | 408  | 28            | 20                    | 17                   | 13                           | 20               | 13                             | 9                                | 62                             | 73                               | 33         | 56            | 11                        |
|                                   | Adm cog >=21                     | 504  | 20            | 13                    | 12                   | 7                            | 14               | 12                             | 10                               | 60                             | 65                               | 39         | 50            | 11                        |
| Anxiolytics: GABA-A               | Overall                          | 2130 | 29            | 17                    | 15                   | 8                            | 18               | 16                             | 10                               | 50                             | 44                               | 44         | 47            | 9                         |
|                                   | Adm cog <=6                      | 339  | 46            | 22                    | 21                   | 11                           | 27               | 18                             | 10                               | 43                             | 27                               | 44         | 42            | 14                        |
|                                   | Adm cog 7-10                     | 374  | 39            | 22                    | 20                   | 9                            | 26               | 18                             | 13                               | 50                             | 47                               | 44         | 49            | 7                         |
|                                   | Adm cog 11-15                    | 495  | 26            | 15                    | 14                   | 8                            | 17               | 16                             | 12                               | 55                             | 54                               | 43         | 51            | 6                         |
|                                   | Adm cog 16-20                    | 408  | 24            | 17                    | 12                   | 9                            | 15               | 11                             | 8                                | 52                             | 43                               | 43         | 48            | 9                         |
|                                   | Adm cog >=21                     | 504  | 17            | 12                    | 9                    | 6                            | 11               | 11                             | 7                                | 55                             | 51                               | 46         | 45            | 9                         |
| Anxiolytics: H1                   | Overall                          | 2130 | >0            | >0                    | >0                   | >0                           | >0               | 9                              | 5                                | 36                             | 27                               | 59         | 27            | 14                        |
|                                   | Adm cog <=6                      | 339  | >0            | >0                    | >0                   | >0                           | 0                | 12                             | 15                               | 51                             | 38                               | 67         | 33            | 0                         |
|                                   | Adm cog 7-10                     | 374  | 1             | >0                    | >0                   | 0                            | 0                | 16                             | 3                                | 26                             | 7                                | 60         | 40            | 0                         |
|                                   | Adm cog 11-15                    | 495  | >0            | 0                     | 0                    | 0                            | 0                | 2                              | 2                                | 8                              | 5                                | 100        | 0             | 0                         |
|                                   | Adm cog 16-20                    | 408  | >0            | >0                    | >0                   | >0                           | 0                | 9                              | 9                                | 60                             | 50                               | 33         | 4             | 62                        |
|                                   | Adm cog >=21                     | 504  | 1             | >0                    | >0                   | >0                           | 0                | 7                              | 6                                | 42                             | 32                               | 40         | 44            | 17                        |
| Anxiolytics: Other                | Overall                          | 2130 | 7             | 3                     | 6                    | 2                            | 6                | 21                             | 17                               | 68                             | 77                               | 2          | 85            | 13                        |
|                                   | Adm cog <=6                      | 339  | 9             | 3                     | 6                    | 2                            | 9                | 26                             | 25                               | 63                             | 68                               | 3          | 78            | 19                        |
|                                   | Adm cog 7-10                     | 374  | 10            | 3                     | 8                    | 2                            | 9                | 22                             | 17                               | 62                             | 63                               | 3          | 87            | 11                        |
|                                   | Adm cog 11-15                    | 495  | 8             | 4                     | 6                    | 3                            | 7                | 22                             | 15                               | 71                             | 82                               | 0          | 92            | 8                         |
|                                   | Adm cog 16-20                    | 408  | 8             | 4                     | 7                    | 3                            | 6                | 15                             | 13                               | 72                             | 88                               | 3          | 84            | 13                        |
|                                   | Adm cog >=21                     | 504  | 3             | 1                     | 2                    | >0                           | 3                | 20                             | 17                               | 85                             | 84                               | 0          | 85            | 15                        |
|                                   | Overall                          | 2130 | 47            | 35                    | 39                   | 28                           | 43               | 23                             | 17                               | 81                             | 100                              | 6          | 76            | 19                        |
|                                   | Adm cog <=6                      | 339  | 50            | 32                    | 40                   | 25                           | 48               | 35                             | 28                               | 76                             | 93                               | 8          | 71            | 21                        |
|                                   | Adm cog 7-10                     | 374  | 52            | 34                    | 42                   | 26                           | 48               | 27                             | 23                               | 77                             | 94                               | 3          | 85            | 12                        |
|                                   | Adm cog 11-15                    | 495  | 46            | 34                    | 39                   | 28                           | 44               | 22                             | 18                               | 83                             | 100                              | 4          | 80            | 16                        |

|                                            |               |      |    |    |    |    |    |    |    |     |     |     |     |    |
|--------------------------------------------|---------------|------|----|----|----|----|----|----|----|-----|-----|-----|-----|----|
| Anticonvulsants                            | Adm cog 16-20 | 408  | 46 | 38 | 41 | 33 | 43 | 19 | 15 | 87  | 100 | 4   | 73  | 22 |
|                                            | Adm cog >=21  | 504  | 41 | 37 | 32 | 28 | 36 | 13 | 12 | 83  | 100 | 10  | 67  | 24 |
| Anticonvulsants: Ca+<br>Channel Antagonist | Overall       | 2130 | 31 | 21 | 26 | 17 | 28 | 23 | 17 | 80  | 100 | 7   | 71  | 23 |
|                                            | Adm cog <=6   | 339  | 30 | 19 | 25 | 15 | 29 | 36 | 29 | 75  | 90  | 10  | 67  | 22 |
|                                            | Adm cog 7-10  | 374  | 34 | 20 | 26 | 14 | 31 | 28 | 23 | 73  | 82  | 4   | 81  | 14 |
|                                            | Adm cog 11-15 | 495  | 29 | 19 | 25 | 17 | 28 | 22 | 19 | 81  | 100 | 4   | 74  | 22 |
|                                            | Adm cog 16-20 | 408  | 31 | 24 | 29 | 21 | 29 | 19 | 15 | 87  | 100 | 5   | 69  | 26 |
|                                            | Adm cog >=21  | 504  | 29 | 24 | 25 | 20 | 25 | 13 | 12 | 85  | 100 | 10  | 61  | 29 |
| Anticonvulsants: GABA-A<br>(Agonist)       | Overall       | 2130 | >0 | >0 | >0 | >0 | 0  | 14 | 14 | 46  | 43  | 0   | 100 | 0  |
|                                            | Adm cog <=6   | 339  | >0 | 0  | 0  | 0  | 0  | 23 | 23 | 26  | 26  | 0   | 100 | 0  |
|                                            | Adm cog 7-10  | 374  | >0 | 0  | 0  | 0  | 0  | 23 | 23 | 58  | 58  | 0   | 100 | 0  |
|                                            | Adm cog 11-15 | 495  | >0 | >0 | >0 | >0 | 0  | 5  | 5  | 71  | 71  | 0   | 100 | 0  |
|                                            | Adm cog >=21  | 504  | >0 | 0  | 0  | 0  | 0  | 5  | 5  | 28  | 28  | 0   | 100 | 0  |
| Anticonvulsants: Na+<br>Channel Antagonist | Overall       | 2130 | 25 | 17 | 18 | 12 | 22 | 21 | 16 | 73  | 91  | 5   | 82  | 13 |
|                                            | Adm cog <=6   | 339  | 31 | 15 | 22 | 10 | 30 | 29 | 24 | 66  | 76  | 5   | 73  | 22 |
|                                            | Adm cog 7-10  | 374  | 31 | 18 | 24 | 13 | 28 | 23 | 20 | 69  | 78  | 4   | 88  | 8  |
|                                            | Adm cog 11-15 | 495  | 24 | 17 | 18 | 13 | 22 | 21 | 17 | 77  | 97  | 5   | 89  | 5  |
|                                            | Adm cog 16-20 | 408  | 23 | 19 | 18 | 14 | 21 | 18 | 14 | 81  | 100 | 3   | 79  | 18 |
|                                            | Adm cog >=21  | 504  | 18 | 17 | 11 | 10 | 14 | 13 | 10 | 74  | 100 | 8   | 79  | 13 |
| Anticonvulsants: Other                     | Overall       | 2130 | >0 | >0 | >0 | >0 | 0  | 27 | 26 | 80  | 100 | 33  | 67  | 0  |
|                                            | Adm cog 7-10  | 374  | >0 | >0 | 0  | 0  | 0  | 11 | 11 | 39  | 39  | 100 | 0   | 0  |
|                                            | Adm cog 11-15 | 495  | >0 | >0 | >0 | >0 | 0  | 44 | 44 | 100 | 100 | 0   | 100 | 0  |
|                                            | Adm cog 16-20 | 408  | >0 | >0 | >0 | >0 | 0  | 26 | 26 | 100 | 100 | 0   | 100 | 0  |
| Antidepressants                            | Overall       | 2130 | 67 | 44 | 55 | 37 | 61 | 23 | 18 | 78  | 93  | 27  | 60  | 13 |
|                                            | Adm cog <=6   | 339  | 77 | 47 | 64 | 40 | 73 | 34 | 29 | 79  | 94  | 23  | 62  | 15 |
|                                            | Adm cog 7-10  | 374  | 76 | 48 | 63 | 39 | 72 | 26 | 22 | 78  | 90  | 25  | 65  | 10 |
|                                            | Adm cog 11-15 | 495  | 66 | 46 | 54 | 38 | 60 | 21 | 19 | 80  | 95  | 30  | 57  | 13 |
|                                            | Adm cog 16-20 | 408  | 69 | 49 | 58 | 42 | 62 | 17 | 14 | 78  | 95  | 28  | 57  | 15 |
|                                            | Adm cog >=21  | 504  | 53 | 35 | 41 | 28 | 42 | 15 | 12 | 74  | 90  | 30  | 57  | 13 |
| Antidepressants: NDRI                      | Overall       | 2130 | 1  | >0 | 1  | >0 | 1  | 12 | 10 | 69  | 87  | 7   | 83  | 10 |
|                                            | Adm cog <=6   | 339  | >0 | >0 | >0 | >0 | 0  | 28 | 29 | 84  | 100 | 0   | 100 | 0  |
|                                            | Adm cog 7-10  | 374  | 1  | >0 | >0 | >0 | 0  | 15 | 10 | 54  | 54  | 0   | 75  | 25 |
|                                            | Adm cog 11-15 | 495  | 1  | >0 | 1  | >0 | 1  | 11 | 9  | 58  | 40  | 0   | 86  | 14 |
|                                            | Adm cog 16-20 | 408  | >0 | >0 | >0 | >0 | 0  | 9  | 10 | 73  | 92  | 33  | 67  | 0  |
|                                            | Adm cog >=21  | 504  | 2  | 2  | 2  | 1  | 2  | 9  | 8  | 74  | 94  | 5   | 86  | 8  |

|                                         |               |      |    |    |    |    |    |    |    |    |    |    |     |    |
|-----------------------------------------|---------------|------|----|----|----|----|----|----|----|----|----|----|-----|----|
| Antidepressants:NaSSA                   | Overall       | 2130 | 3  | >0 | 3  | >0 | 3  | 21 | 16 | 57 | 64 | 9  | 76  | 15 |
|                                         | Adm cog <=6   | 339  | 5  | >0 | 4  | >0 | 4  | 16 | 14 | 36 | 30 | 13 | 52  | 35 |
|                                         | Adm cog 7-10  | 374  | 5  | 1  | 4  | >0 | 5  | 33 | 32 | 67 | 82 | 5  | 84  | 11 |
|                                         | Adm cog 11-15 | 495  | 2  | >0 | 2  | >0 | 2  | 19 | 16 | 57 | 62 | 8  | 83  | 8  |
|                                         | Adm cog 16-20 | 408  | 4  | 2  | 3  | 1  | 3  | 12 | 12 | 62 | 68 | 13 | 77  | 11 |
|                                         | Adm cog >=21  | 504  | >0 | >0 | >0 | >0 | >0 | 22 | 20 | 84 | 86 | 0  | 100 | 0  |
| Antidepressants: SARI                   | Overall       | 2130 | 53 | 35 | 36 | 25 | 45 | 20 | 16 | 70 | 83 | 39 | 50  | 11 |
|                                         | Adm cog <=6   | 339  | 63 | 40 | 42 | 30 | 57 | 30 | 26 | 73 | 90 | 31 | 58  | 11 |
|                                         | Adm cog 7-10  | 374  | 62 | 40 | 42 | 27 | 57 | 23 | 20 | 70 | 81 | 36 | 54  | 10 |
|                                         | Adm cog 11-15 | 495  | 54 | 36 | 37 | 27 | 47 | 19 | 17 | 72 | 89 | 41 | 49  | 10 |
|                                         | Adm cog 16-20 | 408  | 53 | 37 | 37 | 27 | 45 | 15 | 13 | 71 | 83 | 41 | 47  | 13 |
|                                         | Adm cog >=21  | 504  | 37 | 25 | 25 | 16 | 27 | 11 | 9  | 64 | 72 | 47 | 41  | 12 |
| Antidepressants: SNRI                   | Overall       | 2130 | 5  | 2  | 4  | 2  | 4  | 19 | 16 | 67 | 73 | 4  | 79  | 17 |
|                                         | Adm cog <=6   | 339  | 4  | 1  | 4  | 1  | 4  | 26 | 24 | 59 | 50 | 10 | 69  | 21 |
|                                         | Adm cog 7-10  | 374  | 4  | >0 | 4  | >0 | 4  | 27 | 20 | 68 | 68 | >0 | 89  | 11 |
|                                         | Adm cog 11-15 | 495  | 5  | 1  | 4  | 1  | 4  | 18 | 19 | 60 | 71 | 4  | 74  | 22 |
|                                         | Adm cog 16-20 | 408  | 6  | 3  | 5  | 3  | 5  | 14 | 13 | 74 | 81 | 2  | 86  | 12 |
|                                         | Adm cog >=21  | 504  | 4  | 2  | 4  | 1  | 4  | 13 | 10 | 71 | 81 | 5  | 75  | 20 |
| Antidepressants: SSRI                   | Overall       | 2130 | 26 | 12 | 24 | 10 | 25 | 23 | 18 | 74 | 84 | 2  | 79  | 19 |
|                                         | Adm cog <=6   | 339  | 32 | 9  | 29 | 6  | 31 | 32 | 27 | 65 | 66 | 4  | 70  | 26 |
|                                         | Adm cog 7-10  | 374  | 31 | 13 | 29 | 11 | 29 | 26 | 22 | 70 | 77 | 2  | 83  | 15 |
|                                         | Adm cog 11-15 | 495  | 24 | 12 | 23 | 11 | 24 | 22 | 18 | 79 | 93 | >0 | 80  | 19 |
|                                         | Adm cog 16-20 | 408  | 27 | 13 | 25 | 13 | 25 | 18 | 15 | 77 | 92 | 2  | 80  | 18 |
|                                         | Adm cog >=21  | 504  | 19 | 11 | 16 | 10 | 17 | 19 | 15 | 81 | 95 | 3  | 82  | 15 |
| Antidepressants: TCA - secondary amines | Overall       | 2130 | 2  | >0 | >0 | >0 | 2  | 21 | 13 | 55 | 55 | 7  | 76  | 18 |
|                                         | Adm cog <=6   | 339  | 3  | 0  | 1  | 0  | 2  | 22 | 23 | 54 | 55 | 5  | 53  | 42 |
|                                         | Adm cog 7-10  | 374  | 1  | 0  | >0 | 0  | 0  | 18 | 16 | 41 | 36 | 0  | 100 | 0  |
|                                         | Adm cog 11-15 | 495  | 1  | >0 | >0 | >0 | 1  | 21 | 12 | 60 | 67 | 0  | 86  | 14 |
|                                         | Adm cog 16-20 | 408  | 1  | >0 | >0 | >0 | 1  | 6  | 7  | 47 | 45 | 4  | 66  | 30 |
|                                         | Adm cog >=21  | 504  | 2  | >0 | >0 | >0 | 2  | 29 | 26 | 65 | 63 | 18 | 82  | 0  |
| Antidepressants: TCA -                  | Overall       | 2130 | 3  | >0 | 2  | >0 | 3  | 16 | 14 | 62 | 67 | 5  | 72  | 23 |
|                                         | Adm cog <=6   | 339  | 4  | >0 | 3  | >0 | 4  | 20 | 17 | 53 | 54 | 0  | 73  | 27 |
|                                         | Adm cog 7-10  | 374  | 3  | >0 | 2  | >0 | 3  | 14 | 11 | 53 | 54 | 11 | 73  | 17 |
|                                         | Adm cog 11-15 | 495  | 2  | >0 | 2  | >0 | 2  | 13 | 10 | 55 | 55 | 8  | 58  | 33 |
|                                         | Adm cog 16-20 | 408  | 4  | 2  | 3  | 1  | 4  | 16 | 14 | 71 | 77 | 0  | 81  | 19 |

|                                |               |      |    |    |    |    |    |    |    |     |     |    |     |    |
|--------------------------------|---------------|------|----|----|----|----|----|----|----|-----|-----|----|-----|----|
| tertiary amines                | Adm cog >=21  | 504  | 2  | >0 | 2  | >0 | 2  | 16 | 14 | 76  | 82  | 11 | 67  | 22 |
| Antiparkinson                  | Overall       | 2130 | 25 | 11 | 20 | 8  | 23 | 25 | 21 | 73  | 83  | 3  | 83  | 14 |
|                                | Adm cog <=6   | 339  | 53 | 24 | 40 | 17 | 49 | 30 | 26 | 70  | 79  | 4  | 84  | 12 |
|                                | Adm cog 7-10  | 374  | 40 | 18 | 31 | 13 | 36 | 25 | 22 | 71  | 85  | 1  | 87  | 12 |
|                                | Adm cog 11-15 | 495  | 21 | 8  | 19 | 7  | 20 | 24 | 19 | 78  | 86  | 2  | 82  | 15 |
|                                | Adm cog 16-20 | 408  | 15 | 4  | 12 | 4  | 13 | 16 | 14 | 71  | 75  | 5  | 72  | 23 |
|                                | Adm cog >=21  | 504  | 6  | 4  | 6  | 3  | 5  | 14 | 14 | 80  | 100 | 5  | 73  | 23 |
| Antiparkinson: COMT Inhibitor  | Overall       | 2130 | >0 | >0 | >0 | >0 | 0  | 23 | 23 | 100 | 100 | 4  | 96  | 0  |
|                                | Adm cog <=6   | 339  | >0 | >0 | >0 | >0 | 0  | 23 | 23 | 100 | 100 | 4  | 96  | 0  |
| Antiparkinson: DA Agonist      | Overall       | 2130 | 9  | 4  | 7  | 2  | 9  | 25 | 21 | 71  | 81  | >0 | 89  | 10 |
|                                | Adm cog <=6   | 339  | 19 | 9  | 11 | 4  | 19 | 27 | 24 | 64  | 72  | >0 | 86  | 13 |
|                                | Adm cog 7-10  | 374  | 16 | 6  | 12 | 4  | 15 | 29 | 23 | 71  | 84  | 0  | 91  | 9  |
|                                | Adm cog 11-15 | 495  | 9  | 3  | 7  | 2  | 8  | 24 | 19 | 79  | 84  | 0  | 97  | 3  |
|                                | Adm cog 16-20 | 408  | 5  | 1  | 4  | >0 | 4  | 14 | 11 | 68  | 75  | 0  | 80  | 20 |
|                                | Adm cog >=21  | 504  | 2  | 1  | 2  | 1  | 2  | 16 | 14 | 93  | 100 | 0  | 89  | 11 |
| Antiparkinson: MAO Inhibitor   | Overall       | 2130 | >0 | >0 | >0 | >0 | >0 | 20 | 16 | 59  | 49  | >0 | 63  | 37 |
|                                | Adm cog <=6   | 339  | 1  | 0  | >0 | 0  | 0  | 24 | 25 | 25  | 25  | 0  | 25  | 75 |
|                                | Adm cog 7-10  | 374  | 2  | 1  | 1  | >0 | 1  | 13 | 10 | 49  | 33  | 2  | 84  | 14 |
|                                | Adm cog 11-15 | 495  | >0 | >0 | >0 | >0 | 0  | 34 | 21 | 88  | 100 | 0  | 33  | 67 |
|                                | Adm cog 16-20 | 408  | >0 | >0 | >0 | >0 | 0  | 11 | 14 | 70  | 100 | 0  | 67  | 33 |
|                                | Adm cog >=21  | 504  | >0 | >0 | >0 | >0 | 0  | 25 | 25 | 100 | 100 | 0  | 100 | 0  |
| Antiparkinson: NMDA Antagonist | Overall       | 2130 | 17 | 6  | 13 | 5  | 15 | 24 | 19 | 66  | 71  | 4  | 81  | 15 |
|                                | Adm cog <=6   | 339  | 42 | 17 | 31 | 11 | 37 | 29 | 24 | 66  | 75  | 4  | 86  | 10 |
|                                | Adm cog 7-10  | 374  | 25 | 10 | 19 | 7  | 22 | 22 | 18 | 64  | 66  | 2  | 85  | 13 |
|                                | Adm cog 11-15 | 495  | 13 | 5  | 11 | 4  | 12 | 21 | 16 | 70  | 73  | 4  | 76  | 20 |
|                                | Adm cog 16-20 | 408  | 9  | 2  | 6  | 2  | 8  | 16 | 12 | 65  | 64  | 8  | 69  | 24 |
|                                | Adm cog >=21  | 504  | 4  | 2  | 4  | 1  | 3  | 11 | 12 | 67  | 65  | 7  | 64  | 29 |
|                                | Overall       | 2130 | 1  | >0 | 1  | >0 | 1  | 27 | 20 | 74  | 100 | 3  | 84  | 13 |
|                                | Adm cog <=6   | 339  | 2  | 1  | 1  | >0 | 2  | 38 | 9  | 57  | 66  | 11 | 61  | 29 |
|                                | Adm cog 7-10  | 374  | 3  | >0 | 2  | >0 | 3  | 25 | 19 | 70  | 70  | >0 | 100 | 0  |
|                                | Adm cog 11-15 | 495  | 1  | >0 | 1  | >0 | 1  | 23 | 24 | 77  | 100 | 0  | 100 | 0  |
|                                | Adm cog 16-20 | 408  | 1  | >0 | 1  | >0 | 1  | 24 | 22 | 93  | 100 | 0  | 60  | 40 |

|                                           |               |      |    |    |    |    |    |    |    |     |     |    |     |    |
|-------------------------------------------|---------------|------|----|----|----|----|----|----|----|-----|-----|----|-----|----|
| Antiparkinson : Other                     | Adm cog >=21  | 504  | >0 | >0 | >0 | >0 | 0  | 22 | 22 | 100 | 100 | 0  | 100 | 0  |
| Antipsychotic                             | Overall       | 2130 | 25 | 16 | 15 | 10 | 21 | 20 | 15 | 65  | 75  | 23 | 62  | 15 |
|                                           | Adm cog <=6   | 339  | 38 | 18 | 23 | 10 | 34 | 27 | 20 | 57  | 55  | 29 | 49  | 22 |
|                                           | Adm cog 7-10  | 374  | 34 | 21 | 23 | 13 | 30 | 21 | 17 | 66  | 78  | 24 | 61  | 15 |
|                                           | Adm cog 11-15 | 495  | 28 | 21 | 18 | 13 | 23 | 18 | 15 | 71  | 89  | 18 | 74  | 8  |
|                                           | Adm cog 16-20 | 408  | 22 | 16 | 11 | 7  | 18 | 15 | 13 | 63  | 75  | 17 | 71  | 12 |
|                                           | Adm cog >=21  | 504  | 10 | 8  | 6  | 5  | 7  | 12 | 9  | 65  | 70  | 33 | 50  | 16 |
| Antipsychotic: First generation/typical   | Overall       | 2130 | 3  | 1  | >0 | >0 | >0 | 7  | 1  | 21  | 7   | 47 | 39  | 14 |
|                                           | Adm cog <=6   | 339  | 3  | 2  | >0 | 0  | 0  | 7  | 2  | 12  | 4   | 49 | 37  | 14 |
|                                           | Adm cog 7-10  | 374  | 3  | 1  | >0 | 0  | 0  | 4  | 1  | 11  | 4   | 62 | 23  | 15 |
|                                           | Adm cog 11-15 | 495  | 3  | 2  | 1  | >0 | 1  | 12 | 2  | 34  | 21  | 41 | 47  | 13 |
|                                           | Adm cog 16-20 | 408  | 2  | >0 | >0 | >0 | 0  | 5  | 1  | 21  | 7   | 29 | 64  | 7  |
|                                           | Adm cog >=21  | 504  | 1  | >0 | >0 | >0 | 0  | 5  | 1  | 28  | 10  | 49 | 30  | 21 |
| Antipsychotic: Second generation/atypical | Overall       | 2130 | 24 | 15 | 15 | 9  | 21 | 20 | 15 | 67  | 78  | 22 | 63  | 15 |
|                                           | Adm cog <=6   | 339  | 37 | 16 | 22 | 9  | 33 | 27 | 20 | 58  | 56  | 29 | 48  | 23 |
|                                           | Adm cog 7-10  | 374  | 33 | 20 | 23 | 13 | 30 | 22 | 18 | 68  | 79  | 22 | 63  | 15 |
|                                           | Adm cog 11-15 | 495  | 26 | 19 | 17 | 13 | 22 | 18 | 16 | 74  | 92  | 15 | 76  | 9  |
|                                           | Adm cog 16-20 | 408  | 21 | 15 | 11 | 7  | 17 | 15 | 13 | 65  | 75  | 17 | 71  | 12 |
|                                           | Adm cog >=21  | 504  | 9  | 7  | 6  | 4  | 7  | 13 | 11 | 71  | 79  | 31 | 53  | 15 |
| Hypnotic                                  | Overall       | 2130 | 30 | 14 | 20 | 10 | 23 | 18 | 13 | 60  | 67  | 48 | 42  | 10 |
|                                           | Adm cog <=6   | 339  | 36 | 14 | 23 | 9  | 29 | 24 | 21 | 57  | 58  | 34 | 51  | 16 |
|                                           | Adm cog 7-10  | 374  | 37 | 17 | 26 | 12 | 31 | 22 | 18 | 62  | 70  | 41 | 50  | 9  |
|                                           | Adm cog 11-15 | 495  | 31 | 15 | 20 | 10 | 25 | 18 | 14 | 61  | 68  | 47 | 46  | 7  |
|                                           | Adm cog 16-20 | 408  | 25 | 13 | 16 | 8  | 16 | 11 | 9  | 57  | 64  | 55 | 35  | 9  |
|                                           | Adm cog >=21  | 504  | 24 | 13 | 16 | 9  | 17 | 11 | 8  | 62  | 70  | 68 | 23  | 10 |
| Hypnotic: GABA-A Agonist (benzodiazepine) | Overall       | 2130 | 5  | 1  | 3  | >0 | 3  | 11 | 6  | 39  | 28  | 46 | 48  | 6  |
|                                           | Adm cog <=6   | 339  | 4  | >0 | 2  | 0  | 2  | 10 | 7  | 25  | 20  | 39 | 55  | 7  |
|                                           | Adm cog 7-10  | 374  | 6  | >0 | 4  | >0 | 4  | 16 | 15 | 44  | 42  | 33 | 63  | 4  |
|                                           | Adm cog 11-15 | 495  | 5  | >0 | 3  | >0 | 3  | 13 | 10 | 46  | 36  | 36 | 64  | 0  |
|                                           | Adm cog 16-20 | 408  | 4  | 1  | 2  | >0 | 2  | 7  | 3  | 35  | 28  | 67 | 29  | 4  |
|                                           | Adm cog >=21  | 504  | 4  | 2  | 2  | >0 | 1  | 6  | 2  | 39  | 25  | 61 | 24  | 14 |
|                                           | Overall       | 2130 | 25 | 13 | 17 | 8  | 20 | 18 | 14 | 61  | 67  | 51 | 42  | 8  |
|                                           | Adm cog <=6   | 339  | 30 | 12 | 19 | 7  | 26 | 25 | 23 | 60  | 67  | 35 | 52  | 13 |

|                                                  |               |      |    |    |    |    |    |    |    |    |     |    |     |    |
|--------------------------------------------------|---------------|------|----|----|----|----|----|----|----|----|-----|----|-----|----|
| Hypnotic: GABA-A Agonist<br>(non-benzodiazepine) | Adm cog 7-10  | 374  | 32 | 16 | 22 | 11 | 28 | 23 | 19 | 64 | 71  | 42 | 50  | 8  |
|                                                  | Adm cog 11-15 | 495  | 26 | 13 | 15 | 8  | 20 | 17 | 14 | 59 | 63  | 54 | 42  | 4  |
|                                                  | Adm cog 16-20 | 408  | 21 | 11 | 15 | 7  | 14 | 12 | 9  | 60 | 66  | 56 | 37  | 7  |
|                                                  | Adm cog >=21  | 504  | 19 | 11 | 13 | 8  | 15 | 12 | 8  | 64 | 71  | 70 | 23  | 7  |
| Hypnotic: Melatonin Agonist                      | Overall       | 2130 | >0 | >0 | >0 | >0 | >0 | 18 | 10 | 54 | 47  | 8  | 54  | 38 |
|                                                  | Adm cog <=6   | 339  | 2  | >0 | 1  | >0 | 1  | 30 | 25 | 56 | 55  | 0  | 50  | 50 |
|                                                  | Adm cog 7-10  | 374  | >0 | 0  | >0 | 0  | 0  | 12 | 12 | 71 | 71  | 0  | 100 | 0  |
|                                                  | Adm cog 11-15 | 495  | >0 | >0 | >0 | 0  | 0  | 7  | 8  | 37 | 37  | 25 | 25  | 50 |
|                                                  | Adm cog >=21  | 504  | >0 | >0 | >0 | >0 | 0  | 10 | 10 | 73 | 73  | 0  | 100 | 0  |
| Hypnotic: Other                                  | Overall       | 2130 | 3  | >0 | 2  | >0 | 2  | 16 | 5  | 43 | 25  | 39 | 34  | 27 |
|                                                  | Adm cog <=6   | 339  | 5  | 1  | 3  | >0 | 3  | 21 | 13 | 42 | 47  | 30 | 53  | 18 |
|                                                  | Adm cog 7-10  | 374  | 3  | >0 | 2  | >0 | 2  | 19 | 13 | 50 | 65  | 46 | 38  | 15 |
|                                                  | Adm cog 11-15 | 495  | 3  | >0 | 2  | >0 | 2  | 21 | 15 | 62 | 78  | 18 | 46  | 36 |
|                                                  | Adm cog 16-20 | 408  | 2  | >0 | >0 | 0  | 0  | 4  | 2  | 17 | 11  | 50 | 13  | 38 |
|                                                  | Adm cog >=21  | 504  | 2  | >0 | >0 | >0 | 0  | 5  | 2  | 30 | 9   | 64 | 0   | 36 |
| Narcotic Analgesic                               | Overall       | 2130 | 72 | 55 | 45 | 36 | 59 | 16 | 13 | 65 | 77  | 63 | 26  | 11 |
|                                                  | Adm cog <=6   | 339  | 71 | 50 | 35 | 26 | 59 | 21 | 17 | 56 | 51  | 63 | 25  | 12 |
|                                                  | Adm cog 7-10  | 374  | 74 | 50 | 40 | 29 | 60 | 18 | 14 | 57 | 59  | 61 | 30  | 9  |
|                                                  | Adm cog 11-15 | 495  | 73 | 56 | 42 | 35 | 59 | 16 | 13 | 62 | 70  | 64 | 26  | 10 |
|                                                  | Adm cog 16-20 | 408  | 75 | 60 | 51 | 43 | 60 | 14 | 12 | 69 | 90  | 57 | 32  | 12 |
|                                                  | Adm cog >=21  | 504  | 69 | 59 | 52 | 46 | 58 | 14 | 11 | 78 | 100 | 69 | 19  | 12 |
| Micellaneous Psychotropic                        | Overall       | 2130 | 18 | 8  | 15 | 6  | 16 | 19 | 15 | 69 | 75  | 9  | 78  | 13 |
|                                                  | Adm cog <=6   | 339  | 24 | 4  | 22 | 3  | 23 | 26 | 21 | 58 | 59  | 16 | 76  | 8  |
|                                                  | Adm cog 7-10  | 374  | 19 | 7  | 14 | 5  | 17 | 21 | 17 | 65 | 68  | 10 | 77  | 13 |
|                                                  | Adm cog 11-15 | 495  | 21 | 10 | 17 | 8  | 20 | 17 | 16 | 73 | 81  | 4  | 84  | 12 |
|                                                  | Adm cog 16-20 | 408  | 19 | 12 | 16 | 9  | 17 | 16 | 14 | 75 | 90  | 5  | 78  | 17 |
|                                                  | Adm cog >=21  | 504  | 10 | 7  | 7  | 6  | 8  | 13 | 9  | 72 | 98  | 14 | 69  | 18 |
| Micellaneous Psychotropic:<br>AChE Inhibitor     | Overall       | 2130 | 9  | 1  | 8  | 1  | 8  | 21 | 15 | 58 | 58  | 17 | 75  | 8  |
|                                                  | Adm cog <=6   | 339  | 18 | 1  | 17 | 1  | 17 | 26 | 20 | 54 | 56  | 21 | 73  | 6  |
|                                                  | Adm cog 7-10  | 374  | 11 | 1  | 9  | 1  | 10 | 21 | 17 | 56 | 56  | 15 | 73  | 12 |
|                                                  | Adm cog 11-15 | 495  | 10 | 2  | 9  | 2  | 9  | 16 | 13 | 63 | 65  | 9  | 85  | 6  |
|                                                  | Adm cog 16-20 | 408  | 5  | 1  | 5  | 1  | 5  | 17 | 14 | 62 | 60  | 9  | 78  | 13 |
|                                                  | Adm cog >=21  | 504  | 2  | >0 | 2  | >0 | 2  | 15 | 10 | 61 | 50  | 57 | 33  | 10 |
|                                                  | Overall       | 2130 | 1  | >0 | 1  | >0 | 1  | 20 | 15 | 68 | 77  | 9  | 70  | 21 |

|                                               |               |      |    |    |    |    |    |    |    |    |     |    |     |    |
|-----------------------------------------------|---------------|------|----|----|----|----|----|----|----|----|-----|----|-----|----|
| Micellaneous Psychotropic:<br>NMDA Antagonist | Adm cog <=6   | 339  | 2  | >0 | 2  | >0 | 2  | 33 | 16 | 64 | 65  | 18 | 40  | 43 |
|                                               | Adm cog 7-10  | 374  | 2  | >0 | >0 | >0 | 0  | 22 | 11 | 53 | 52  | 0  | 83  | 17 |
|                                               | Adm cog 11-15 | 495  | 2  | >0 | 2  | >0 | 1  | 16 | 18 | 79 | 89  | 3  | 72  | 24 |
|                                               | Adm cog 16-20 | 408  | 2  | >0 | 2  | >0 | 1  | 11 | 14 | 72 | 86  | 15 | 85  | 0  |
| Micellaneous<br>Psychotropic: Other           | Overall       | 2130 | 9  | 6  | 7  | 5  | 8  | 17 | 14 | 77 | 92  | 3  | 81  | 17 |
|                                               | Adm cog <=6   | 339  | 5  | 2  | 4  | 1  | 5  | 24 | 21 | 71 | 79  | 0  | 90  | 10 |
|                                               | Adm cog 7-10  | 374  | 8  | 5  | 5  | 3  | 8  | 19 | 15 | 74 | 88  | 9  | 79  | 13 |
|                                               | Adm cog 11-15 | 495  | 11 | 8  | 8  | 5  | 11 | 19 | 17 | 80 | 95  | >0 | 83  | 16 |
|                                               | Adm cog 16-20 | 408  | 13 | 10 | 10 | 7  | 12 | 15 | 13 | 78 | 94  | 2  | 79  | 20 |
|                                               | Adm cog >=21  | 504  | 8  | 7  | 6  | 5  | 6  | 12 | 10 | 75 | 100 | 3  | 78  | 19 |
| Stimulant                                     | Overall       | 2130 | 28 | 7  | 22 | 6  | 26 | 23 | 18 | 66 | 72  | 5  | 83  | 12 |
|                                               | Adm cog <=6   | 339  | 57 | 16 | 41 | 12 | 54 | 29 | 27 | 67 | 75  | 4  | 79  | 17 |
|                                               | Adm cog 7-10  | 374  | 44 | 10 | 36 | 9  | 43 | 25 | 22 | 68 | 78  | 3  | 89  | 8  |
|                                               | Adm cog 11-15 | 495  | 25 | 5  | 20 | 4  | 23 | 19 | 16 | 63 | 64  | 5  | 84  | 11 |
|                                               | Adm cog 16-20 | 408  | 15 | 5  | 12 | 4  | 13 | 13 | 11 | 65 | 67  | 9  | 78  | 14 |
|                                               | Adm cog >=21  | 504  | 8  | 2  | 7  | 2  | 6  | 11 | 9  | 64 | 64  | 10 | 79  | 10 |
| Stimulant: NE Agonist                         | Overall       | 2130 | 3  | >0 | 2  | >0 | 2  | 23 | 17 | 56 | 57  | 0  | 92  | 8  |
|                                               | Adm cog <=6   | 339  | 4  | >0 | 4  | >0 | 4  | 33 | 29 | 60 | 53  | 0  | 100 | 0  |
|                                               | Adm cog 7-10  | 374  | 6  | 0  | 5  | 0  | 5  | 22 | 23 | 57 | 72  | 0  | 94  | 6  |
|                                               | Adm cog 11-15 | 495  | 3  | >0 | 2  | >0 | 3  | 26 | 15 | 62 | 69  | 0  | 77  | 23 |
|                                               | Adm cog 16-20 | 408  | 1  | >0 | >0 | 0  | 0  | 5  | 6  | 36 | 27  | 0  | 100 | 0  |
|                                               | Adm cog >=21  | 504  | >0 | >0 | >0 | 0  | 0  | 16 | 16 | 39 | 39  | 0  | 100 | 0  |
| Stimulant: NE-DA-5HT<br>Agonist               | Overall       | 2130 | 23 | 5  | 18 | 4  | 21 | 23 | 18 | 64 | 70  | 6  | 81  | 13 |
|                                               | Adm cog <=6   | 339  | 51 | 11 | 38 | 8  | 48 | 28 | 27 | 64 | 72  | 5  | 77  | 18 |
|                                               | Adm cog 7-10  | 374  | 35 | 7  | 29 | 6  | 33 | 25 | 22 | 65 | 72  | 4  | 89  | 7  |
|                                               | Adm cog 11-15 | 495  | 21 | 4  | 17 | 3  | 19 | 19 | 16 | 61 | 62  | 6  | 82  | 12 |
|                                               | Adm cog 16-20 | 408  | 13 | 5  | 10 | 3  | 10 | 13 | 11 | 64 | 72  | 11 | 76  | 13 |
|                                               | Adm cog >=21  | 504  | 6  | 2  | 5  | 2  | 5  | 11 | 10 | 63 | 64  | 10 | 75  | 14 |
| Stimulant: Other                              | Overall       | 2130 | 6  | 2  | 4  | 1  | 5  | 22 | 15 | 64 | 67  | 1  | 83  | 16 |
|                                               | Adm cog <=6   | 339  | 11 | 6  | 4  | 3  | 10 | 29 | 18 | 57 | 49  | 0  | 69  | 31 |
|                                               | Adm cog 7-10  | 374  | 10 | 3  | 9  | 2  | 10 | 25 | 22 | 72 | 86  | >0 | 84  | 15 |
|                                               | Adm cog 11-15 | 495  | 4  | 1  | 3  | >0 | 3  | 16 | 10 | 60 | 61  | >0 | 100 | 0  |
|                                               | Adm cog 16-20 | 408  | 3  | >0 | 2  | >0 | 2  | 12 | 9  | 60 | 56  | 0  | 82  | 18 |
|                                               | Adm cog >=21  | 504  | 2  | >0 | 2  | >0 | 1  | 9  | 6  | 59 | 50  | 11 | 89  | 0  |

\* 10 patients were excluded due to missing Admission FIM cognitive score

† r'cd = received

‡ sched = scheduled
